# Supplementary figures and images for: In silico whole-genome screening for cancer-related single-nucleotide polymorphisms located in human mRNA untranslated regions
Source: Springer Nature journal article supplement (doi:10.1186/1471-2164-8-2), 2007-01-03

**A**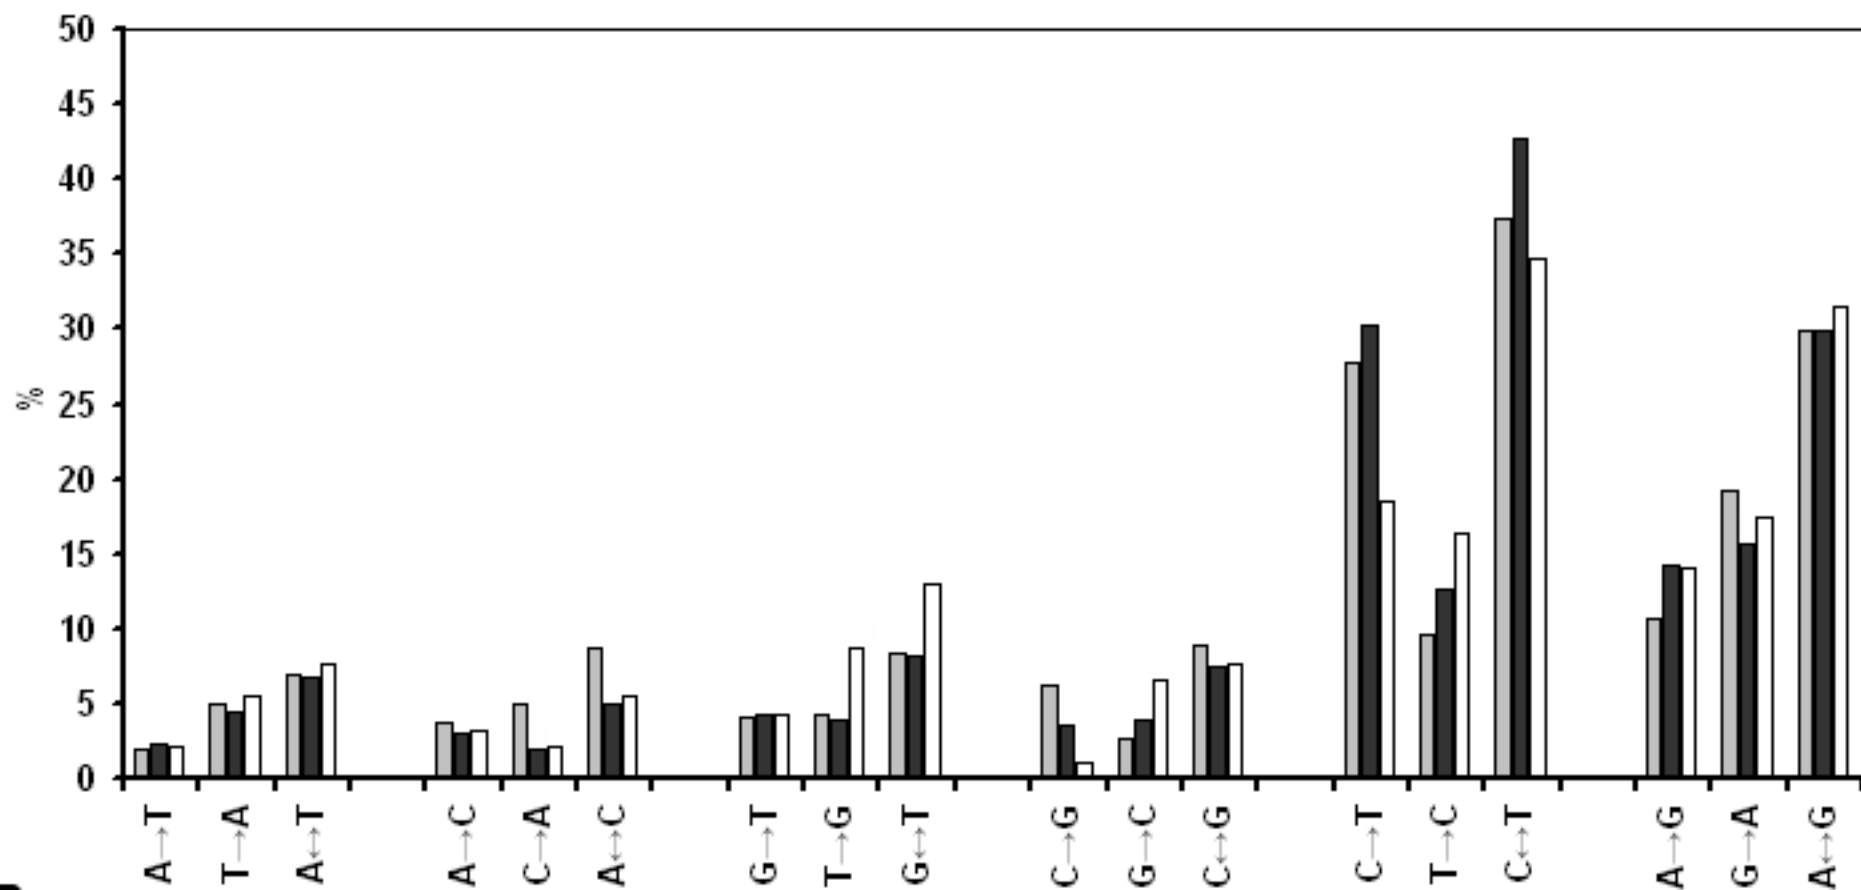**B**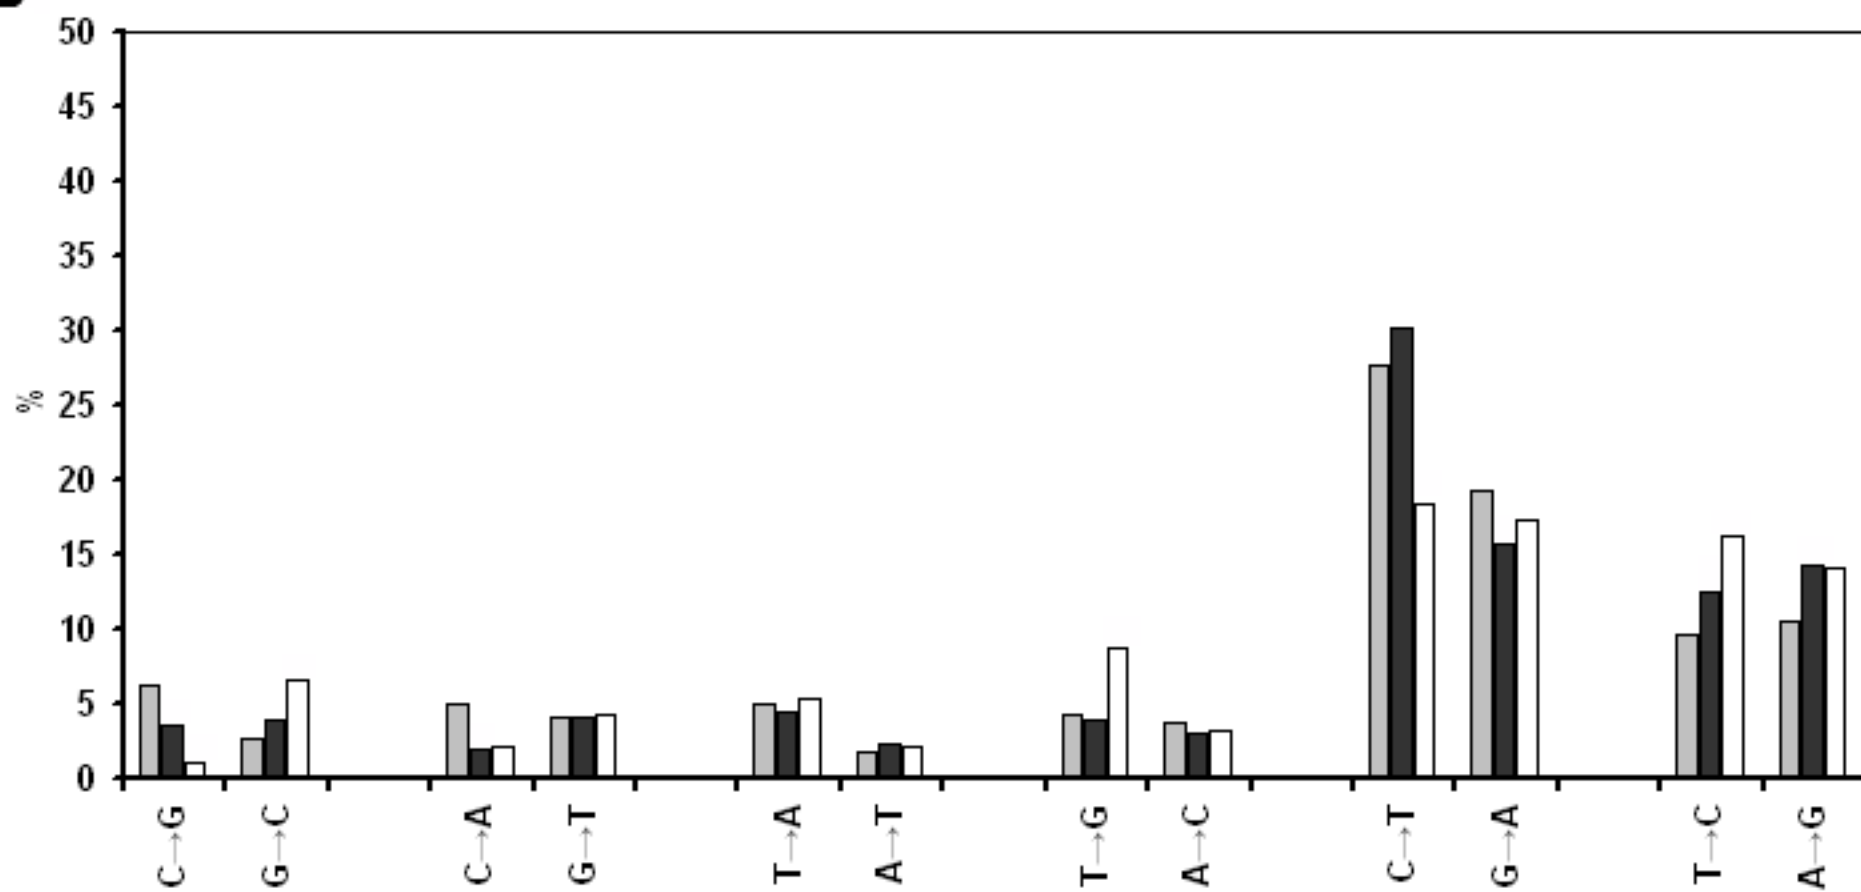

■ Total UTR-SNPs (n=20,304)

■ Cancer-associated UTR-SNPs (n=358)

□ Cancer-associated UTR-SNPs (permutation pool, n=92)

Supplement: Additional file 4 [file 1471-2164-8-2-s4.pdf]
